# Supplementary figures and images for: Evaluation of Health Surveillance System Attributes: The Case of Neglected Tropical Diseases in Kenya
Source: Research Square preprint supplement (doi:10.21203/rs.3.rs-76619/v1), 2020-10-06

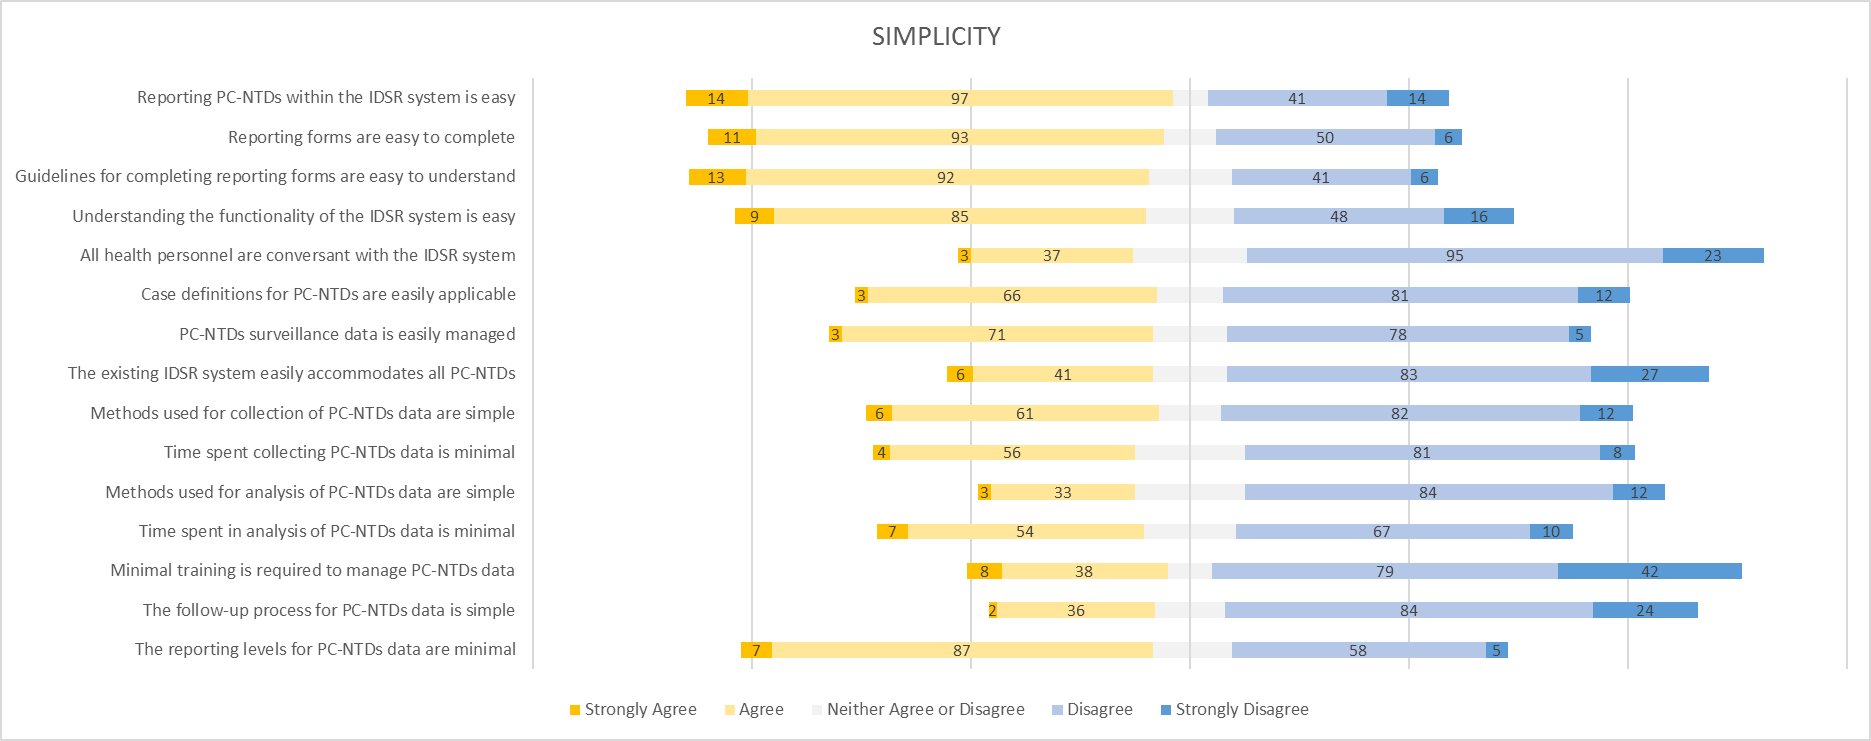


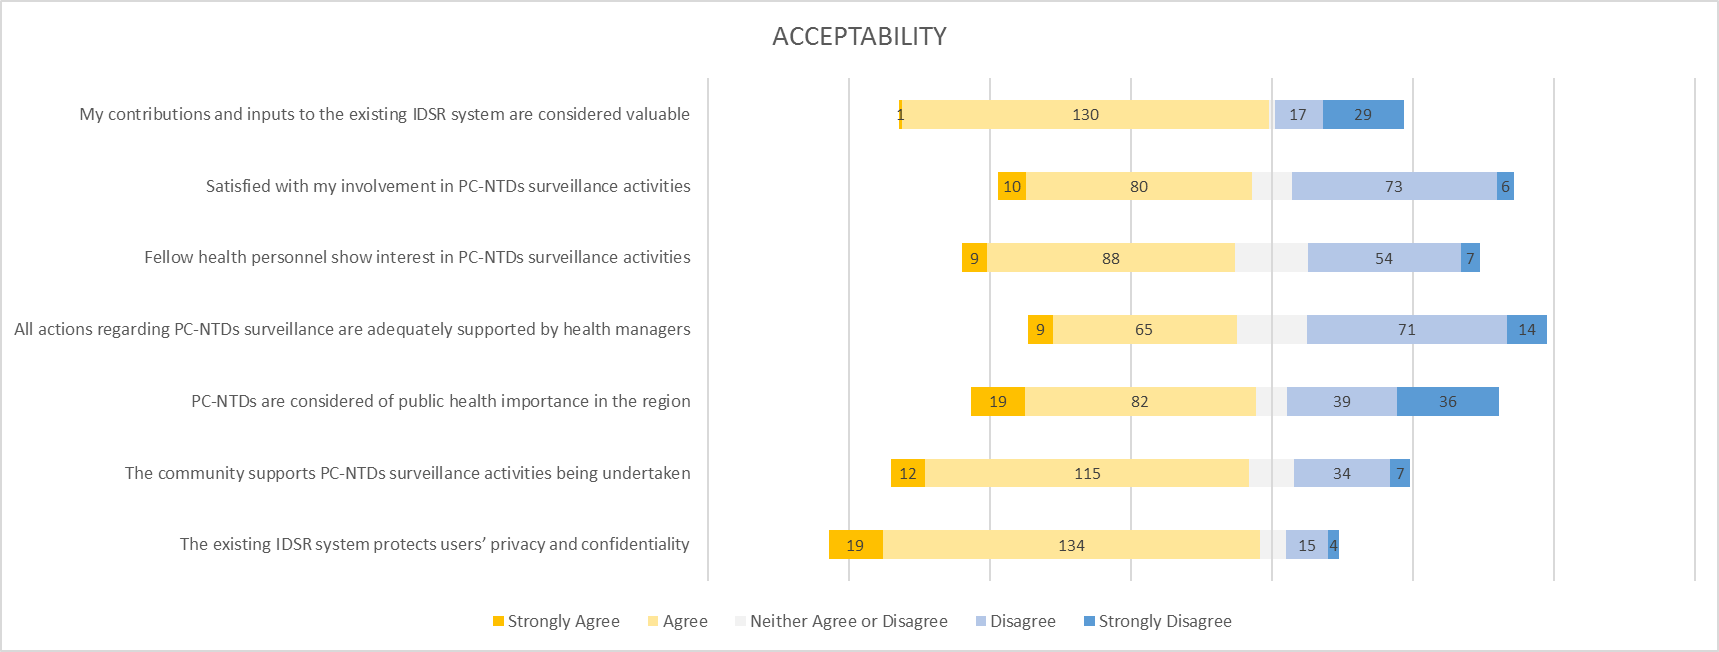


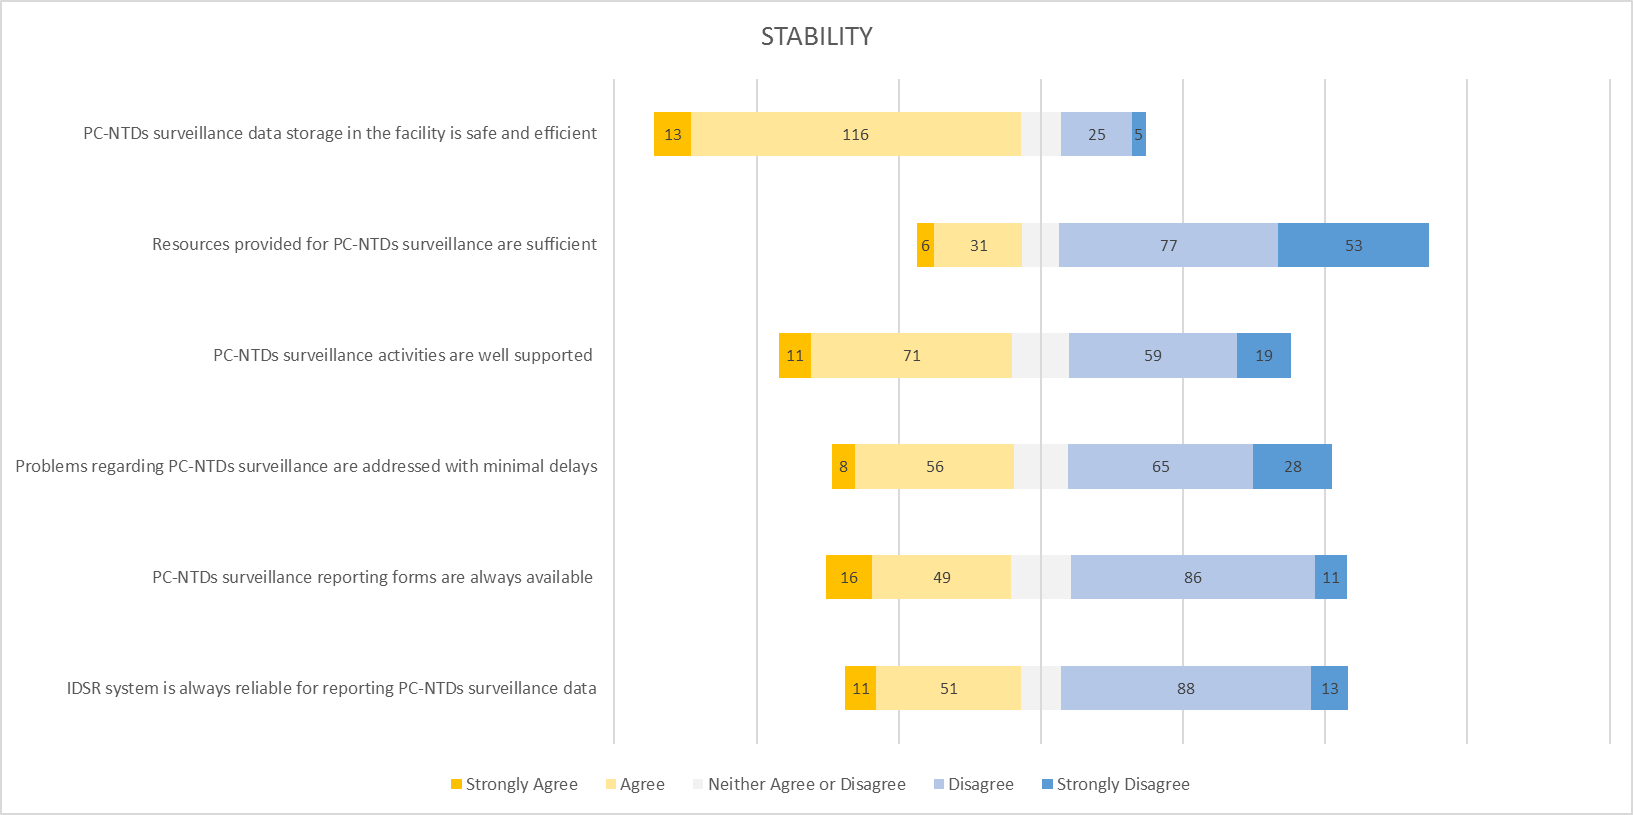


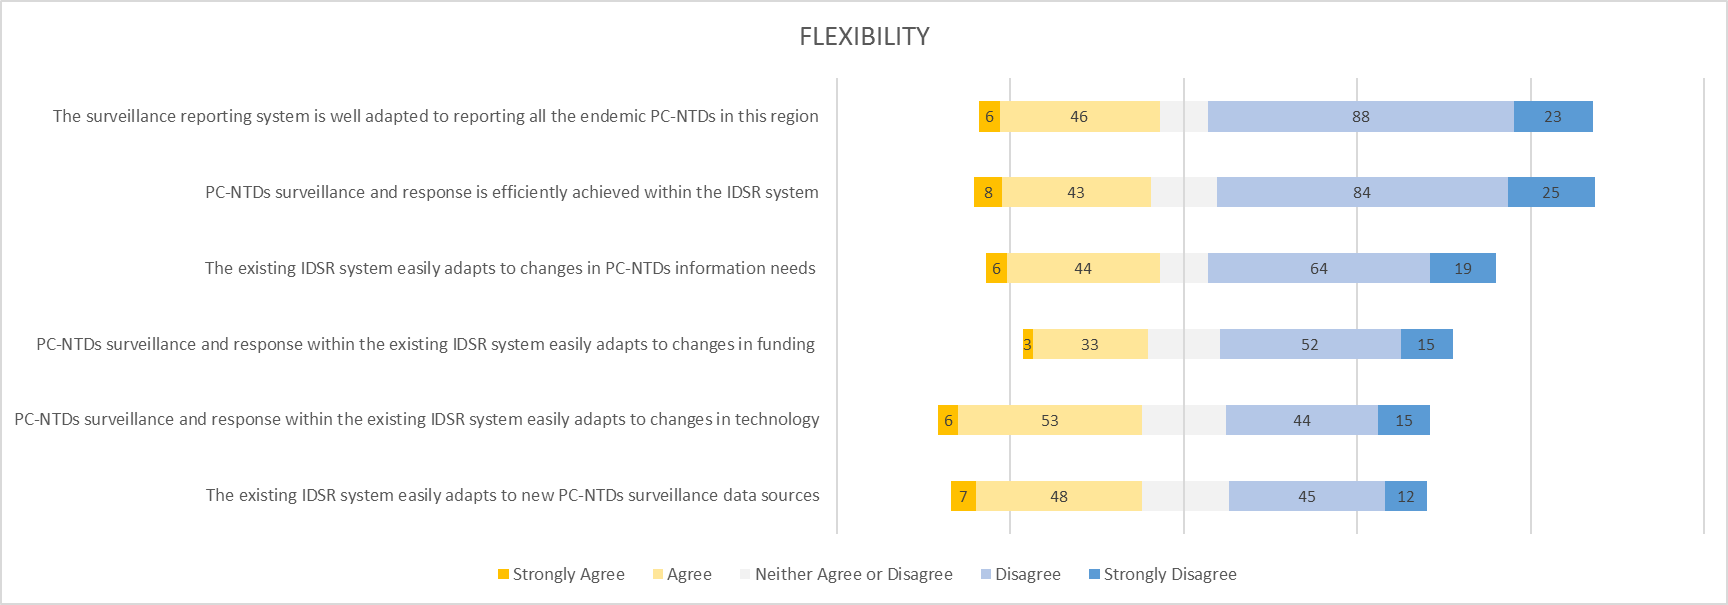


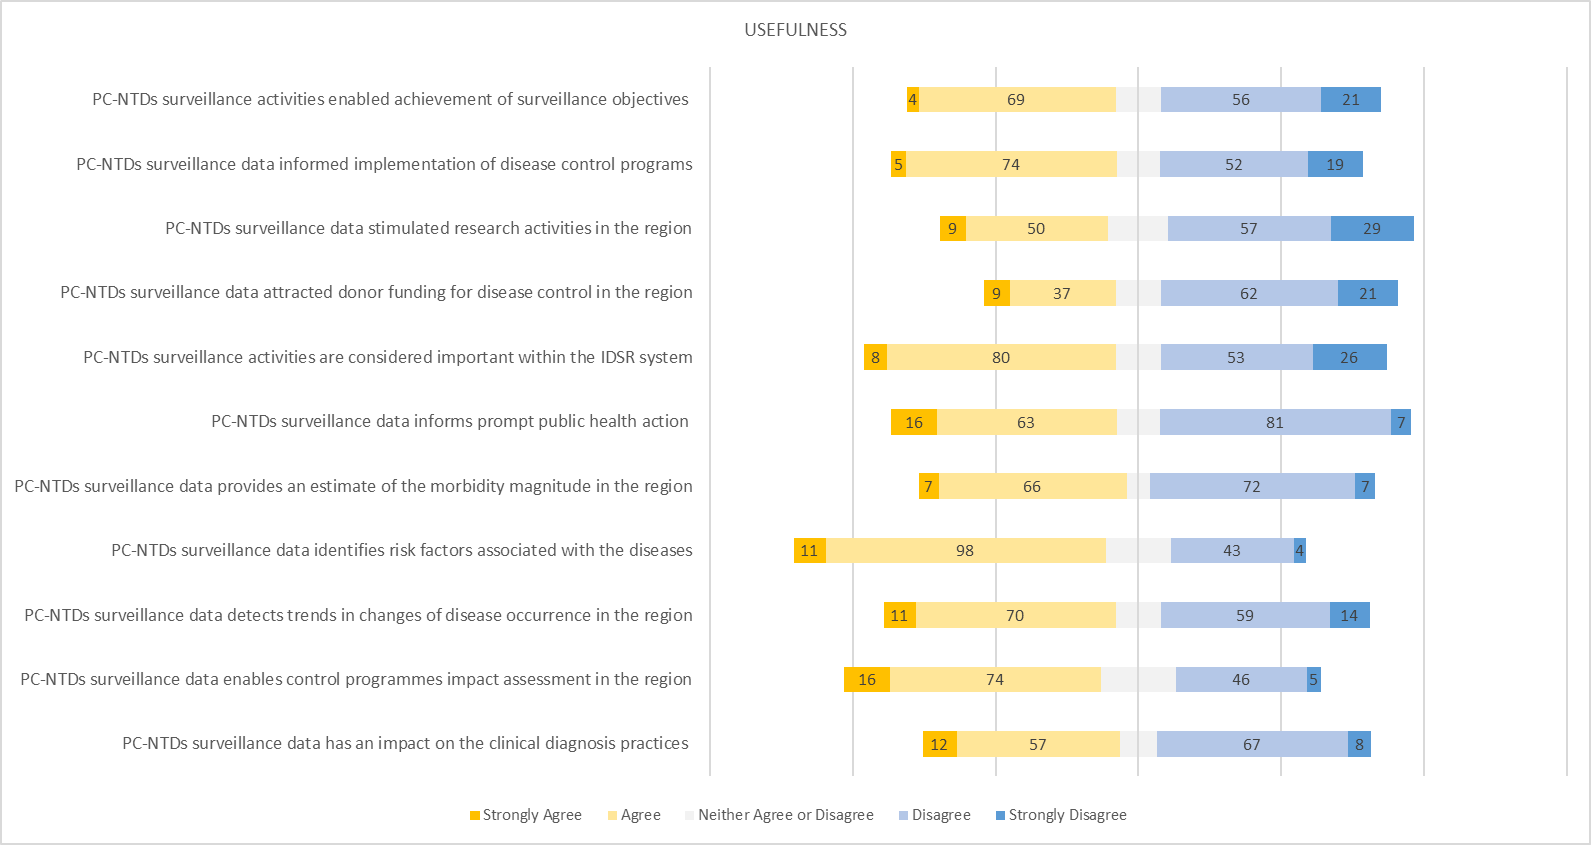


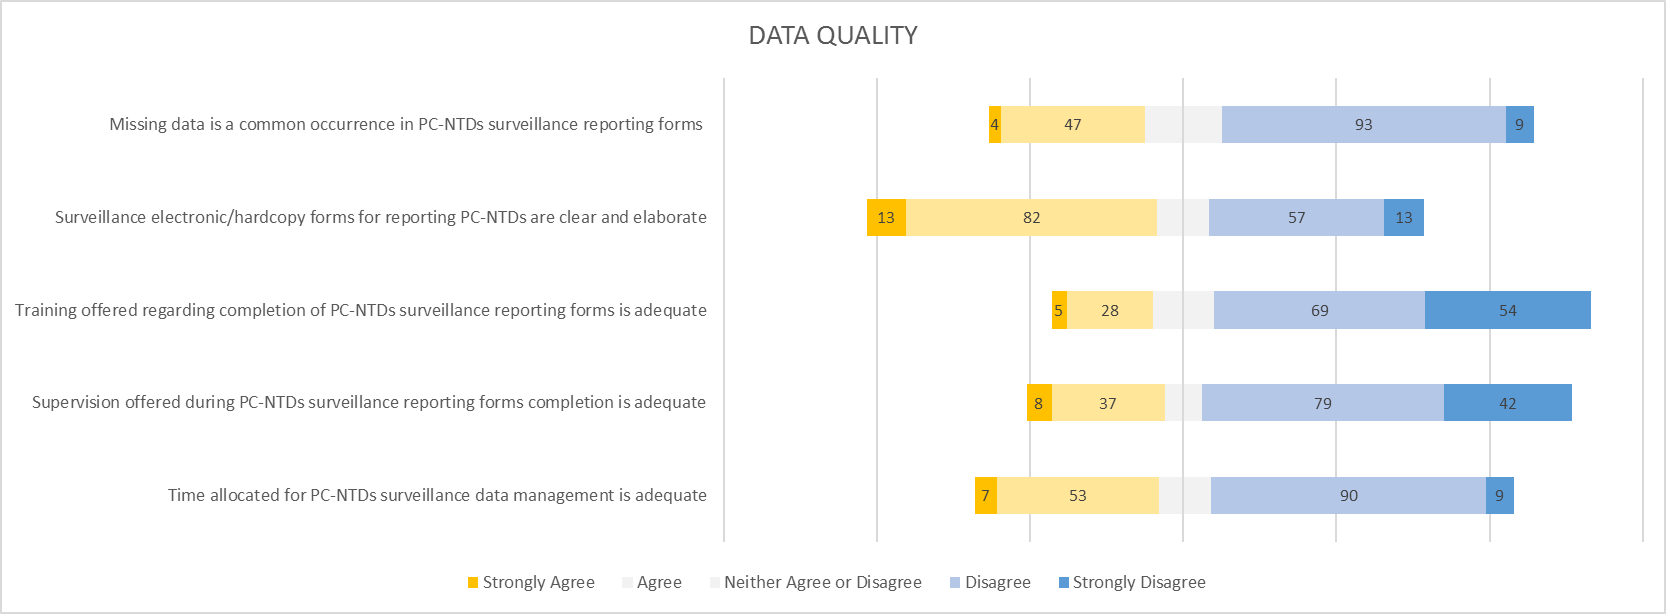

Supplement: Supplementary file 1 [file 6bc398606a6b597ac084905e.docx]
